# Supplementary material for: Proinflammatory Cytokine IL-6 and JAK-STAT Signaling Pathway in Myeloproliferative Neoplasms
Source: PubMed Central journal article supplement (PMC4602333; doi:10.1155/2015/453020), 2015-09-29
Supplement: 453020.f1.pdf [file 453020.f1.pdf]

**Supplemental Table 1.** The statistically significant genes among MPNs in hematopoietic CD34<sup>+</sup> progenitors determined by microarray analysis and related to *JAK2V617F* mutation. BG – Between Groups

| PV               |     | A       |      | B            |      | C          |      | p value | Max. Mean Differ |
|------------------|-----|---------|------|--------------|------|------------|------|---------|------------------|
| <i>JAK2V617F</i> |     | Control |      | heterozygote |      | homozygote |      |         |                  |
| Gene             | BG  | Mean    | SD   | Mean         | SD   | Mean       | SD   |         |                  |
| LAMP1            | B-A | -0.27   | 0.38 | 1.70         | 0.20 | 1.22       | 0.29 | 0.00001 | 1.97             |
| ATP6V1B2         | C-A | 0.54    | 0.20 | 2.05         | 0.22 | 2.19       | 0.22 | 0.00001 | 1.65             |
| CREBL2           | C-A | 0.26    | 0.26 | 1.07         | 0.23 | 1.37       | 0.20 | 0.00002 | 1.10             |
| PARP9            | C-A | 0.62    | 0.21 | 2.35         | 0.45 | 2.64       | 0.24 | 0.00002 | 2.02             |
| KIAA0930         | B-A | 1.37    | 0.46 | 3.13         | 0.32 | 2.56       | 0.47 | 0.00003 | 1.76             |
| SOD2             | C-A | 1.74    | 0.17 | 2.45         | 0.26 | 2.69       | 0.40 | 0.00008 | 0.95             |
| TYMP             | C-A | 2.24    | 0.40 | 3.74         | 0.00 | 4.23       | 0.05 | 0.00010 | 1.99             |
| RNF213           | C-A | 0.45    | 0.04 | 0.99         | 0.08 | 1.72       | 0.10 | 0.00010 | 1.27             |
| CHMP5            | C-A | 0.44    | 0.68 | 1.87         | 0.21 | 2.27       | 0.45 | 0.00011 | 1.83             |
| SSU72            | B-A | -1.06   | 0.23 | -0.38        | 0.19 | -0.53      | 0.14 | 0.00019 | 0.69             |
| NPHP3            | B-C | 0.38    | 0.00 | 1.49         | 0.06 | 0.74       | 0.05 | 0.00019 | 0.75             |
| DPF3             | A-C | -0.84   | 0.10 | -1.65        | 0.00 | -2.12      | 0.19 | 0.00019 | 1.28             |
| CORO1C           | B-A | 0.35    | 0.52 | 1.87         | 0.33 | 1.26       | 0.21 | 0.00019 | 1.53             |
| FLJ11292         | A-C | 1.88    | 0.65 | 0.56         | 0.20 | -0.66      | 0.30 | 0.00019 | 2.54             |
| EGFL8            | A-C | 1.27    | 0.18 | 0.53         | 0.24 | 0.51       | 0.24 | 0.00021 | 0.76             |
| LGALS9           | A-B | 1.10    | 0.18 | -0.12        | 0.08 | 0.60       | 0.26 | 0.00022 | 1.22             |
| MFSD1            | C-A | 1.52    | 0.49 | 2.66         | 0.31 | 2.75       | 0.30 | 0.00031 | 1.22             |
| AFG3L1P          | A-B | 0.96    | 0.11 | -0.33        | 0.10 |            |      | 0.00032 | 1.29             |
| ATP1B3           | C-A | -1.05   | 0.27 | -0.68        | 0.00 | -0.18      | 0.13 | 0.00034 | 0.86             |
| PSMB9            | C-A | 1.49    | 0.44 | 2.64         | 0.28 | 2.84       | 0.45 | 0.00038 | 1.35             |
| TGFBI            | B-A | -0.31   | 0.34 | 1.24         | 0.36 | 0.27       | 0.58 | 0.00042 | 1.55             |
| PTTG1IP          | C-A | -0.75   | 0.24 | -0.29        | 0.01 | 0.04       | 0.10 | 0.00043 | 0.79             |
| LAP3             | C-A | 0.34    | 0.31 | 1.69         | 0.17 | 2.25       | 0.33 | 0.00048 | 1.92             |
| SSX5             | A-C | 2.95    | 0.31 | 2.41         | 0.48 | 1.71       | 0.28 | 0.00050 | 1.24             |
| FAM26F           | C-A | 2.73    | 0.69 | 4.11         | 0.36 | 4.77       | 0.51 | 0.00050 | 2.05             |
| EIF4EBP2         | B-A | 1.17    | 0.32 | 2.57         | 0.65 | 1.85       | 0.22 | 0.00052 | 1.40             |
| CDKN2D           | C-A | 1.80    | 0.44 | 2.81         | 0.22 | 3.17       | 0.42 | 0.00055 | 1.37             |
| PDLIM5           | B-A | 1.02    | 0.41 | 2.21         | 0.26 | 2.04       | 0.23 | 0.00061 | 1.18             |
| FAM127A          | A-C | -0.28   | 0.55 | -1.32        | 0.04 | -1.44      | 0.09 | 0.00061 | 1.16             |
| FLJ31306         | C-A | 1.37    | 0.18 | 1.61         | 0.19 | 2.18       | 0.10 | 0.00062 | 0.81             |
| COPB2            | B-A | 0.22    | 0.48 | 1.30         | 0.41 | 1.21       | 0.18 | 0.00066 | 1.08             |
| ST13P4           | A-C | -0.77   | 0.28 | -1.58        | 0.32 | -1.63      | 0.13 | 0.00066 | 0.86             |
| PRICKLE2-AS1     | A-C | 1.86    | 0.24 | 0.80         | 0.20 | 0.35       | 0.04 | 0.00071 | 1.50             |
| STAT1            | C-A | 3.60    | 0.55 | 4.40         | 0.05 | 5.04       | 0.51 | 0.00073 | 1.45             |
| CNTROB           | A-C | 3.08    | 0.32 | 2.32         | 0.57 | 2.08       | 0.11 | 0.00075 | 1.00             |
| RAB8B            | B-A | 1.93    | 0.38 | 3.14         | 0.47 | 3.01       | 0.24 | 0.00077 | 1.21             |
| KRTAP21-2        | A-B | -0.91   | 0.19 | -1.97        | 0.10 | -2.47      | 0.00 | 0.00078 | 1.06             |
| FLJ11292         | A-C | 1.76    | 0.59 | 0.90         | 0.35 | -0.50      | 0.26 | 0.00080 | 2.26             |
| GET4             | A-B | -0.11   | 0.23 | -0.88        | 0.11 | -0.85      | 0.22 | 0.00082 | 0.77             |
| UBE2D1           | C-A | 2.31    | 0.38 | 3.20         | 0.36 | 3.78       | 0.59 | 0.00084 | 1.47             |

|          |     |       |      |       |      |       |      |         |      |
|----------|-----|-------|------|-------|------|-------|------|---------|------|
| GLRX     | C-A | 0.94  | 0.79 | 2.21  | 0.44 | 2.74  | 0.32 | 0.00086 | 1.80 |
| WIBG     | C-A | 0.39  | 0.26 | 0.89  | 0.28 | 1.18  | 0.12 | 0.00088 | 0.79 |
| TMEM60   | C-A | -0.02 | 0.18 | 0.67  | 0.13 | 0.94  | 0.32 | 0.00090 | 0.96 |
| NMI      | C-A | 1.91  | 0.69 | 3.20  | 0.33 | 3.34  | 0.30 | 0.00093 | 1.43 |
| CEP89    | A-C | -0.02 | 0.38 | -0.98 | 0.25 | -1.77 | 0.47 | 0.00093 | 1.75 |
| SLTM     | B-A | 0.55  | 0.17 | 1.41  | 0.04 | 1.03  | 0.06 | 0.00096 | 0.85 |
| NR2F6    | A-C | 1.05  | 0.34 | 0.63  | 0.22 | 0.18  | 0.18 | 0.00100 | 0.87 |
| HSPA8    | C-A | -1.03 | 0.60 | -0.39 | 0.36 | 0.52  | 0.51 | 0.00100 | 1.55 |
| ETNK1    | C-A | 0.39  | 0.23 | 1.25  | 0.36 | 1.42  | 0.15 | 0.00102 | 1.03 |
| SLC27A3  | C-A | 1.35  | 0.54 | 2.39  | 0.27 | 2.51  | 0.40 | 0.00107 | 1.16 |
| WAC      | B-A | -0.20 | 0.41 | 0.88  | 0.36 | 0.57  | 0.27 | 0.00108 | 1.08 |
| C1orf63  | C-A | 1.69  | 0.54 | 2.46  | 0.18 | 2.85  | 0.28 | 0.00109 | 1.16 |
| DDB2     | C-A | -0.44 | 0.09 | -0.22 | 0.14 | 0.39  | 0.06 | 0.00112 | 0.82 |
| MRPS18C  | C-A | -0.44 | 0.43 | 0.64  | 0.61 | 0.65  | 0.15 | 0.00125 | 1.09 |
| ATAD3C   | A-C | 0.87  | 0.68 | -0.15 | 0.07 | -0.43 | 0.24 | 0.00127 | 1.30 |
| FBXL5    | B-A | 2.37  | 0.63 | 3.76  | 0.38 | 3.61  | 0.35 | 0.00136 | 1.39 |
| FUCA1    | C-A | 0.03  | 0.04 | 0.66  | 0.15 | 0.84  | 0.13 | 0.00136 | 0.81 |
| PSME2    | C-A | -0.23 | 0.46 | 0.61  | 0.47 | 1.02  | 0.41 | 0.00147 | 1.25 |
| PANK2    | B-A | 0.53  | 0.39 | 1.54  | 0.25 | 1.43  | 0.40 | 0.00159 | 1.01 |
| CGB1     | A-C | -1.07 | 0.43 | -2.07 | 0.10 | -2.44 | 0.13 | 0.00163 | 1.38 |
| GCA      | C-A | 1.84  | 0.05 | 3.64  | 0.08 | 4.07  | 0.47 | 0.00167 | 2.24 |
| TIA1     | C-B | 0.80  | 0.18 | 0.69  | 0.21 | 1.43  | 0.23 | 0.00168 | 0.74 |
| LYAR     | C-A | -0.89 | 0.32 | -0.60 | 0.22 | -0.08 | 0.23 | 0.00180 | 0.81 |
| PCSK1N   | A-B | -0.58 | 0.17 | -1.70 | 0.25 | -1.88 | 0.00 | 0.00184 | 1.12 |
| SHC1     | B-A | -0.70 | 0.00 | 0.27  | 0.04 |       |      | 0.00186 | 0.97 |
| ARMC1    | C-A | 0.12  | 0.49 | 1.01  | 0.32 | 1.22  | 0.37 | 0.00186 | 1.09 |
| MOB1A    | C-A | 1.39  | 0.43 | 2.06  | 0.19 | 2.43  | 0.20 | 0.00190 | 1.04 |
| DNAJA1   | C-A | -0.10 | 0.48 | 0.73  | 0.32 | 1.07  | 0.37 | 0.00192 | 1.18 |
| AVP      | A-B | 1.01  | 0.19 | 0.42  | 0.03 | 0.51  | 0.15 | 0.00192 | 0.59 |
| KLF2     | B-A | 4.67  | 0.39 | 6.21  | 0.36 | 5.80  | 0.55 | 0.00195 | 1.54 |
| OAZ1     | C-A | 1.10  | 0.61 | 2.07  | 0.40 | 2.28  | 0.20 | 0.00197 | 1.17 |
| MAFF     | A-C | 1.19  | 0.46 | 0.43  | 0.00 | -0.11 | 0.16 | 0.00199 | 1.30 |
| ARID4B   | B-A | 1.34  | 0.49 | 2.39  | 0.37 | 2.22  | 0.26 | 0.00207 | 1.05 |
| C9orf78  | B-A | 1.38  | 0.29 | 2.19  | 0.42 | 1.98  | 0.23 | 0.00209 | 0.81 |
| C19orf6  | A-C | -0.66 | 0.06 | -1.45 | 0.00 | -1.54 | 0.22 | 0.00214 | 0.88 |
| H3F3C    | A-B | 0.49  | 0.61 | -0.88 | 0.39 | -0.55 | 0.40 | 0.00214 | 1.37 |
| TSPAN13  | C-A | -1.14 | 0.09 | -0.54 | 0.10 | 0.04  | 0.13 | 0.00219 | 1.18 |
| TATDN2   | B-A | 0.96  | 0.16 | 1.81  | 0.15 | 1.09  | 0.03 | 0.00222 | 0.85 |
| ARHGAP17 | B-A | -0.02 | 0.23 | 1.93  | 0.14 | 0.28  | 0.17 | 0.00228 | 1.95 |
| FCN1     | C-A | 3.09  | 0.48 | 3.94  | 0.25 | 4.12  | 0.39 | 0.00229 | 1.03 |
| SLC38A5  | A-B | 1.99  | 0.69 | 0.70  | 0.34 | 0.90  | 0.23 | 0.00231 | 1.29 |
| ARPC1A   | C-A | -0.73 | 0.38 | 0.12  | 0.18 | 0.19  | 0.27 | 0.00238 | 0.92 |
| ZNF383   | A-B | 3.15  | 0.60 | 1.94  | 0.17 | 1.97  | 0.40 | 0.00242 | 1.22 |
| FBXL3    | C-A | 1.09  | 0.08 | 1.60  | 0.02 | 1.72  | 0.10 | 0.00244 | 0.63 |
| SRSF1    | C-A | 0.17  | 0.44 | 1.12  | 0.59 | 1.26  | 0.27 | 0.00244 | 1.09 |
| SOD2     | C-A | 1.79  | 0.49 | 2.72  | 0.14 | 3.26  | 0.88 | 0.00245 | 1.47 |

|              |     |       |      |       |      |       |      |         |      |
|--------------|-----|-------|------|-------|------|-------|------|---------|------|
| PCNP         | C-A | 0.13  | 0.70 | 1.30  | 0.33 | 1.39  | 0.24 | 0.00246 | 1.26 |
| ID3          | A-C | -2.10 | 0.48 | -3.02 | 0.16 | -3.14 | 0.10 | 0.00254 | 1.04 |
| KIAA1467     | A-C | -0.37 | 0.50 | -1.39 | 0.29 | -1.50 | 0.25 | 0.00255 | 1.14 |
| NAA20        | C-B | 0.05  | 0.12 | -0.60 | 0.12 | 0.13  | 0.24 | 0.00262 | 0.73 |
| IRF7         | C-A | 1.31  | 0.38 | 2.19  | 0.25 | 2.71  | 0.32 | 0.00266 | 1.40 |
| SEMA4D       | B-A | 1.96  | 0.32 | 3.11  | 0.56 | 2.48  | 0.36 | 0.00268 | 1.15 |
| OAT          | C-A | 0.11  | 0.08 | 0.47  | 0.09 | 0.65  | 0.18 | 0.00275 | 0.54 |
| CALM1        | B-A | -0.17 | 0.38 | 1.16  | 0.43 | 0.42  | 0.51 | 0.00275 | 1.32 |
| FGFR4        | C-A | 1.93  | 0.22 | 2.25  | 0.68 | 3.16  | 0.30 | 0.00275 | 1.23 |
| NCAPH2       | A-C | 1.38  | 0.50 | 0.81  | 0.07 | 0.37  | 0.35 | 0.00277 | 1.01 |
| PREP         | C-B |       |      | 1.53  | 0.12 | 1.90  | 0.07 | 0.00278 | 0.38 |
| SERINC1      | B-A | 1.67  | 0.59 | 2.86  | 0.41 | 2.72  | 0.33 | 0.00286 | 1.19 |
| CASP1        | C-A | 2.82  | 0.79 | 4.57  | 0.30 | 4.65  | 0.62 | 0.00288 | 1.83 |
| NAGK         | C-A | 1.19  | 0.35 | 1.58  | 0.46 | 2.43  | 0.24 | 0.00289 | 1.23 |
| IFITM1       | C-A | 0.17  | 0.64 | 1.34  | 0.49 | 1.83  | 0.87 | 0.00291 | 1.66 |
| CD58         | B-A | 0.96  | 0.33 | 2.26  | 0.25 | 1.95  | 0.27 | 0.00293 | 1.30 |
| LRP6         | A-C | 1.51  | 1.18 | 0.39  | 0.32 | -0.82 | 0.66 | 0.00293 | 2.33 |
| TMSB4X       | C-A | 0.67  | 0.74 | 1.89  | 0.21 | 2.05  | 0.55 | 0.00298 | 1.38 |
| HSPA8        | C-A | -2.63 | 0.59 | -1.50 | 0.14 | -1.37 | 0.13 | 0.00300 | 1.26 |
| HBD          | B-A | -1.46 | 1.04 | 3.02  | 0.69 | 2.07  | 3.18 | 0.00305 | 4.48 |
| LILRB2       | C-A | 3.37  | 0.04 | 3.55  | 0.00 | 5.69  | 0.29 | 0.00309 | 2.32 |
| UG0898H09    | A-B | 2.79  | 0.25 | 1.28  | 0.22 | 0.37  | 0.00 | 0.00312 | 1.52 |
| ARPC5        | C-A | 1.06  | 1.11 | 2.77  | 0.32 | 2.83  | 0.25 | 0.00314 | 1.77 |
| USP8         | B-A | 0.57  | 0.33 | 1.91  | 0.41 | 1.54  | 0.22 | 0.00317 | 1.34 |
| GGT1         | A-B | -1.47 | 0.34 | -2.74 | 0.12 |       |      | 0.00318 | 1.27 |
| GTF2A1       | C-A | 1.02  | 0.27 | 1.58  | 0.36 | 1.90  | 0.19 | 0.00320 | 0.87 |
| KRTAP21-1    | A-B | -0.64 | 0.31 | -1.41 | 0.22 | -1.01 | 0.30 | 0.00330 | 0.77 |
| RAB10        | C-B | 1.60  | 0.46 | 1.60  | 0.37 | 2.58  | 0.18 | 0.00331 | 0.98 |
| LOC286272    | A-C | 2.64  | 1.11 | 1.67  | 0.30 | 0.55  | 0.30 | 0.00332 | 2.09 |
| TAF2         | A-C | -1.41 | 0.70 | -2.21 | 0.10 | -2.67 | 0.23 | 0.00333 | 1.25 |
| ITM2B        | C-A | 0.54  | 0.80 | 1.81  | 0.22 | 1.99  | 0.56 | 0.00337 | 1.45 |
| TACC1        | A-B | 1.38  | 0.28 | 0.08  | 0.10 |       |      | 0.00351 | 1.31 |
| CDK10        | A-B | -0.11 | 0.29 | -0.77 | 0.31 | -0.67 | 0.26 | 0.00356 | 0.65 |
| MTPN         | B-A | 0.46  | 0.71 | 1.68  | 0.22 | 1.54  | 0.23 | 0.00358 | 1.22 |
| B2M          | C-A | 0.99  | 1.13 | 2.47  | 0.11 | 2.98  | 0.57 | 0.00377 | 1.99 |
| LOC100506990 | A-B | 1.19  | 0.36 | 0.39  | 0.25 | 0.45  | 0.27 | 0.00378 | 0.80 |
| LSM14A       | B-A | 0.53  | 0.27 | 1.11  | 0.02 | 1.11  | 0.14 | 0.00383 | 0.58 |
| C21orf30     | A-C | -2.41 | 0.62 | -3.08 | 0.23 | -3.61 | 0.39 | 0.00384 | 1.21 |
| PDCD10       | C-A | 0.99  | 0.71 | 1.84  | 0.35 | 2.32  | 0.24 | 0.00386 | 1.33 |
| LOC100287934 | A-C | 2.18  | 0.64 | 1.44  | 0.14 | 0.94  | 0.24 | 0.00394 | 1.24 |
| JAK1         | C-A | 0.88  | 0.24 | 1.42  | 0.03 | 1.70  | 0.11 | 0.00403 | 0.82 |
| ARPC3        | B-A | 0.20  | 0.45 | 1.14  | 0.22 | 0.98  | 0.40 | 0.00409 | 0.94 |
| ANKRD13A     | C-A | 2.29  | 0.59 | 3.15  | 0.28 | 3.33  | 0.19 | 0.00417 | 1.04 |
| XRCC1        | B-A | -0.20 | 0.11 | 0.66  | 0.09 | -0.18 | 0.10 | 0.00418 | 0.86 |
| PSMB2        | C-A | -1.11 | 0.26 | -0.73 | 0.18 | -0.64 | 0.11 | 0.00419 | 0.48 |
| PDE4B        | A-C | -0.28 | 0.25 | -1.22 | 0.00 | -1.59 | 0.05 | 0.00419 | 1.30 |

|          |     |       |      |       |      |       |      |         |      |
|----------|-----|-------|------|-------|------|-------|------|---------|------|
| SP2      | A-B | 2.26  | 0.80 | 1.02  | 0.25 | 1.06  | 0.22 | 0.00423 | 1.23 |
| ILF3     | A-B | -2.16 | 0.31 | -3.64 | 0.21 | -3.39 | 0.05 | 0.00426 | 1.49 |
| PKNOX2   | A-C | 2.62  | 0.54 | 1.95  | 0.53 | 1.51  | 0.20 | 0.00431 | 1.11 |
| MAP3K4   | A-C | -2.33 | 0.21 | -3.32 | 0.26 | -4.11 | 0.04 | 0.00437 | 1.78 |
| TMCO1    | C-B | -0.02 | 0.14 | -0.25 | 0.14 | 0.20  | 0.08 | 0.00439 | 0.45 |
| U2AF1L4  | A-B | 2.29  | 0.05 | 1.77  | 0.05 | 2.25  | 0.14 | 0.00441 | 0.52 |
| SNX10    | C-A | 2.37  | 0.77 | 3.63  | 0.40 | 3.85  | 0.67 | 0.00445 | 1.49 |
| FGR      | C-A | 1.20  | 0.04 | 2.66  | 0.00 | 2.49  | 0.08 | 0.00445 | 1.29 |
| PYCARD   | C-A | 1.74  | 0.43 | 2.36  | 0.36 | 2.64  | 0.28 | 0.00446 | 0.91 |
| SIGLEC11 | A-B | 0.42  | 0.24 | -1.05 | 0.25 |       |      | 0.00447 | 1.47 |
| POM121   | A-C | 0.01  | 0.23 | -1.17 | 0.07 | -1.48 | 0.36 | 0.00449 | 1.49 |
| RBM5     | B-A | 2.24  | 0.47 | 3.11  | 0.24 | 2.99  | 0.08 | 0.00449 | 0.87 |
| CHST15   | B-A | 2.64  | 0.47 | 3.82  | 0.22 | 3.45  | 0.51 | 0.00449 | 1.18 |
| MICA     | A-B | -1.96 | 0.22 | -3.14 | 0.19 | -3.53 | 0.00 | 0.00450 | 1.18 |
| STAG2    | B-A | 0.63  | 0.47 | 1.65  | 0.36 | 1.35  | 0.24 | 0.00454 | 1.02 |
| SNW1     | B-A | 0.70  | 0.44 | 1.57  | 0.43 | 1.52  | 0.34 | 0.00456 | 0.87 |
| ZNF480   | A-C | 2.06  | 0.76 | 1.45  | 0.20 | 0.54  | 0.11 | 0.00467 | 1.52 |
| GPR161   | A-B | 2.26  | 0.14 | 1.11  | 0.10 |       |      | 0.00477 | 1.15 |
| TBK1     | C-A | 0.81  | 0.35 | 1.56  | 0.56 | 1.89  | 0.26 | 0.00477 | 1.09 |
| HLA-H    | C-A | 0.54  | 0.76 | 1.58  | 0.26 | 1.88  | 0.47 | 0.00494 | 1.34 |
| CKLF     | B-A | -0.05 | 0.44 | 0.84  | 0.38 | 0.74  | 0.38 | 0.00494 | 0.88 |
| FBXO34   | B-A | 0.90  | 0.27 | 2.05  | 0.11 | 0.92  | 0.09 | 0.00509 | 1.16 |
| IL6ST    | B-A | -1.10 | 0.24 | 0.06  | 0.39 | -0.06 | 0.55 | 0.00511 | 1.16 |
| ST7L     | A-B | -1.40 | 0.08 | -2.60 | 0.36 | -3.08 | 0.00 | 0.00512 | 1.20 |
| TMA7     | C-A | 0.39  | 0.43 | 0.94  | 0.12 | 1.11  | 0.20 | 0.00513 | 0.72 |
| SORL1    | B-A | 1.87  | 0.52 | 3.03  | 0.41 | 2.81  | 0.21 | 0.00516 | 1.16 |
| KRT15    | A-C | 3.18  | 0.84 | 2.44  | 0.14 | 1.69  | 0.20 | 0.00523 | 1.48 |
| OCIAD1   | C-A | 1.04  | 0.57 | 1.79  | 0.24 | 1.97  | 0.14 | 0.00524 | 0.93 |
| KIAA2013 | B-A | 0.15  | 0.08 | 1.11  | 0.21 | 1.09  | 0.06 | 0.00527 | 0.96 |
| PEX19    | A-C | 0.82  | 1.06 | -0.56 | 0.41 | -0.88 | 0.18 | 0.00529 | 1.70 |
| MTCP1    | A-B | 0.06  | 0.73 | -1.40 | 0.29 | -1.29 | 0.29 | 0.00537 | 1.46 |
| RHOC     | A-B | -1.20 | 0.38 | -1.89 | 0.25 | -1.81 | 0.25 | 0.00537 | 0.70 |
| PDS5A    | B-C | 0.45  | 0.13 | 1.04  | 0.12 | 0.39  | 0.11 | 0.00550 | 0.65 |
| SKAP2    | B-A | 1.86  | 0.40 | 2.93  | 0.47 | 2.81  | 0.40 | 0.00555 | 1.06 |
| PRB1     | B-A | 1.98  | 0.25 | 3.10  | 0.29 | 2.28  | 0.55 | 0.00558 | 1.12 |
| CHPT1    | B-A | 0.03  | 0.58 | 1.31  | 0.52 | 1.09  | 0.11 | 0.00560 | 1.28 |
| RGS19    | B-A | 1.26  | 0.40 | 2.48  | 0.74 | 2.39  | 0.48 | 0.00560 | 1.22 |
| ORAI1    | A-C | 0.98  | 0.30 | 0.66  | 0.25 | 0.27  | 0.30 | 0.00562 | 0.71 |
| PPIB     | A-C | -1.82 | 0.09 |       |      | -2.32 | 0.21 | 0.00567 | 0.49 |
| CDKN2B   | A-C | 0.64  | 1.05 | -0.37 | 0.34 | -1.43 | 0.72 | 0.00567 | 2.07 |
| DHPS     | A-C | 1.08  | 0.40 | 0.65  | 0.41 | 0.22  | 0.24 | 0.00567 | 0.86 |
| IDI1     | C-B | 0.75  | 0.44 | -0.06 | 0.34 | 0.98  | 0.25 | 0.00567 | 1.04 |
| HCN2     | A-B | -0.65 | 0.12 | -1.50 | 0.22 | -1.17 | 0.23 | 0.00573 | 0.85 |
| FKBP5    | C-A | 0.21  | 0.02 | 1.03  | 0.00 | 1.15  | 0.14 | 0.00574 | 0.94 |
| ATP5H    | B-A | -1.54 | 0.42 | -0.72 | 0.53 | -0.75 | 0.24 | 0.00574 | 0.82 |
| CPVL     | B-A | 2.35  | 0.67 | 3.65  | 0.32 | 3.63  | 0.48 | 0.00574 | 1.30 |

|          |     |       |      |       |      |       |      |         |      |
|----------|-----|-------|------|-------|------|-------|------|---------|------|
| CDRT1    | A-C | 2.07  | 1.30 | 1.07  | 0.32 | -0.37 | 0.87 | 0.00581 | 2.44 |
| ACTB     | B-A | -1.69 | 0.64 | -0.14 | 0.85 | -0.80 | 0.40 | 0.00582 | 1.56 |
| NCOA4    | B-A | 1.01  | 0.76 | 2.26  | 0.29 | 2.04  | 0.22 | 0.00584 | 1.24 |
| RUVBL2   | A-C | -0.41 | 0.40 | -1.09 | 0.15 | -1.11 | 0.36 | 0.00593 | 0.70 |
| SELO     | A-B | 1.76  | 0.35 | 1.00  | 0.34 | 1.08  | 0.26 | 0.00594 | 0.75 |
| CBWD3    | C-A | 0.68  | 0.47 | 1.38  | 0.44 | 1.61  | 0.22 | 0.00600 | 0.92 |
| TMSB4X   | C-A | -0.40 | 0.80 | 1.03  | 0.64 | 1.19  | 0.81 | 0.00603 | 1.59 |
| SIDT2    | B-A | 1.39  | 0.22 | 2.38  | 0.39 | 2.29  | 0.29 | 0.00603 | 0.99 |
| CERS2    | B-A | 0.65  | 0.44 | 1.76  | 0.43 | 1.30  | 0.23 | 0.00604 | 1.11 |
| CFL1P1   | A-C | -1.81 | 0.05 | -3.03 | 0.00 | -2.83 | 0.15 | 0.00604 | 1.02 |
| TATDN3   | C-A | 0.60  | 0.06 | 0.82  | 0.00 | 1.27  | 0.11 | 0.00607 | 0.67 |
| ECM1     | A-B | 0.44  | 0.27 | -0.59 | 0.02 |       |      | 0.00611 | 1.03 |
| B2M      | C-A | 0.78  | 1.19 | 2.13  | 0.11 | 2.77  | 0.53 | 0.00612 | 1.98 |
| CSNK1A1  | B-A | 0.57  | 0.50 | 1.55  | 0.59 | 1.54  | 0.28 | 0.00617 | 0.99 |
| ACTR2    | B-A | 0.53  | 0.65 | 1.74  | 0.50 | 1.64  | 0.43 | 0.00618 | 1.21 |
| CDC42EP3 | B-A | 1.01  | 0.12 | 2.09  | 0.29 | 1.83  | 0.33 | 0.00620 | 1.08 |
| SON      | B-A | 0.24  | 0.51 | 1.45  | 0.61 | 1.00  | 0.35 | 0.00623 | 1.22 |
| DNAJA1   | C-A | 0.07  | 0.32 | 0.57  | 0.34 | 0.77  | 0.23 | 0.00625 | 0.70 |
| CCL4     | A-C | 1.23  | 0.69 | 0.34  | 0.16 | 0.17  | 0.20 | 0.00629 | 1.06 |
| DOM3Z    | A-C | 1.29  | 0.52 | 0.77  | 0.13 | 0.33  | 0.10 | 0.00636 | 0.97 |
| DENR     | C-B | 1.27  | 0.37 | 0.97  | 0.27 | 1.85  | 0.25 | 0.00641 | 0.88 |
| PGR      | A-C | 2.97  | 0.15 | 2.56  | 0.20 | 1.93  | 0.08 | 0.00643 | 1.04 |
| NPC2     | C-A | 0.70  | 0.36 | 1.58  | 0.38 | 1.65  | 0.66 | 0.00649 | 0.95 |
| BIRC2    | C-A | 1.34  | 0.59 | 2.13  | 0.13 | 2.28  | 0.33 | 0.00654 | 0.95 |
| CYTH1    | B-A | 1.67  | 0.39 | 2.86  | 0.59 | 2.17  | 0.54 | 0.00656 | 1.19 |
| FLJ31662 | A-B | 3.60  | 0.11 | 2.03  | 0.07 | 1.39  | 0.00 | 0.00668 | 1.57 |
| NCF2     | B-A | 2.05  | 0.09 | 4.23  | 0.65 | 4.05  | 0.50 | 0.00669 | 2.18 |
| RNASET2  | B-A | 1.44  | 0.31 | 2.20  | 0.36 | 1.87  | 0.30 | 0.00670 | 0.76 |
| OPA3     | A-C | -0.33 | 0.83 | -1.18 | 0.40 | -1.91 | 0.20 | 0.00673 | 1.58 |
| C1QL1    | A-C | -0.63 | 0.71 | -1.39 | 0.23 | -1.77 | 0.15 | 0.00674 | 1.14 |
| ELAVL1   | C-B | -0.12 | 0.05 | -0.17 | 0.05 | 0.44  | 0.16 | 0.00682 | 0.61 |
| DTX2     | C-A | 1.56  | 0.27 | 1.98  | 0.07 | 2.05  | 0.18 | 0.00691 | 0.49 |
| GPBP1    | C-A | 1.25  | 0.58 | 1.98  | 0.37 | 2.31  | 0.36 | 0.00692 | 1.06 |
| HNMT     | C-A | 0.72  | 0.09 | 1.91  | 0.20 | 2.15  | 0.44 | 0.00696 | 1.42 |
| OS9      | B-A | 0.03  | 0.28 | 0.89  | 0.60 | 0.54  | 0.23 | 0.00712 | 0.86 |
| EEF1A1   | C-B | -1.98 | 0.47 | -3.26 | 1.48 | -1.12 | 0.22 | 0.00713 | 2.14 |
| RPSAP58  | C-A | -0.54 | 0.29 | -0.39 | 0.48 | 0.29  | 0.39 | 0.00713 | 0.83 |
| DERL2    | C-B | 1.35  | 0.19 | 0.74  | 0.00 | 1.44  | 0.17 | 0.00717 | 0.70 |
| TMSB4XP2 | B-A | -1.15 | 0.43 | -0.25 | 0.35 | -0.33 | 0.54 | 0.00728 | 0.90 |
| OR10C1   | A-C | 2.91  | 0.55 | 2.20  | 0.47 | 1.63  | 0.33 | 0.00731 | 1.28 |
| PLEKHA2  | C-A | 2.13  | 0.53 | 2.87  | 0.32 | 3.00  | 0.28 | 0.00733 | 0.88 |
| SERPINE2 | A-C | -2.22 | 0.43 | -3.05 | 0.17 | -3.24 | 0.71 | 0.00733 | 1.02 |
| SNX14    | C-A | 1.71  | 0.56 | 2.58  | 0.28 | 2.60  | 0.38 | 0.00734 | 0.89 |
| SDHB     | C-A | -0.29 | 0.39 | 0.51  | 0.39 | 0.52  | 0.47 | 0.00740 | 0.80 |
| ROMO1    | A-B | -0.23 | 0.39 | -0.94 | 0.15 | -0.69 | 0.25 | 0.00744 | 0.71 |
| APBB1    | A-C | 2.29  | 0.18 | 1.91  | 0.04 | 1.52  | 0.12 | 0.00745 | 0.78 |

|                  |           |                |           |             |           |                     |           |                |                         |
|------------------|-----------|----------------|-----------|-------------|-----------|---------------------|-----------|----------------|-------------------------|
| ARHGAP35         | A-C       | 2.27           | 1.07      | 0.86        | 0.51      | 0.56                | 0.48      | 0.00749        | 1.71                    |
| RPL13AP6         | A-B       | -2.96          | 0.45      | -3.75       | 0.35      | -3.68               | 0.33      | 0.00772        | 0.79                    |
| DOT1L            | A-B       | -1.14          | 0.06      | -2.26       | 0.08      | -2.40               | 0.00      | 0.00773        | 1.12                    |
| KYNU             | C-A       | 0.62           | 0.55      | 1.49        | 0.29      | 1.62                | 0.53      | 0.00775        | 1.01                    |
| HLA-DQB1         | B-A       | 4.35           | 0.43      | 5.50        | 0.18      | 5.19                | 0.42      | 0.00778        | 1.15                    |
| GALNT7           | B-A       | 1.03           | 0.46      | 1.77        | 0.31      | 1.77                | 0.25      | 0.00802        | 0.74                    |
| NCF1             | C-A       | 1.69           | 0.77      | 2.79        | 0.27      | 3.07                | 0.71      | 0.00806        | 1.38                    |
| SIGLEC8          | A-C       | -1.59          | 0.24      | -2.78       | 0.30      | -3.09               | 0.19      | 0.00810        | 1.50                    |
| NEK7             | B-A       | 0.87           | 0.37      | 1.89        | 0.41      | 1.84                | 0.44      | 0.00837        | 1.02                    |
| FLOT2            | B-A       | 0.43           | 0.04      | 0.89        | 0.03      | 0.71                | 0.05      | 0.00842        | 0.45                    |
| YWHAH            | B-A       | 0.17           | 0.52      | 1.23        | 0.27      | 1.00                | 0.40      | 0.00878        | 1.06                    |
| JKAMP            | C-A       | 1.56           | 0.60      | 1.76        | 0.22      | 2.57                | 0.17      | 0.00889        | 1.01                    |
| DMWD             | A-C       | 1.57           | 0.45      | 0.77        | 0.16      | 0.74                | 0.11      | 0.00889        | 0.83                    |
| CACUL1           | A-C       | 0.22           | 0.85      | -0.48       | 0.29      | -1.16               | 0.24      | 0.00894        | 1.38                    |
| C8orf44          | A-C       | 2.55           | 0.79      | 1.48        | 0.20      | 1.26                | 0.30      | 0.00894        | 1.29                    |
| SEPT7            | C-A       | -1.36          | 0.23      | -0.77       | 0.28      | -0.69               | 0.14      | 0.00903        | 0.67                    |
| GOLGA6L2         | A-C       | 1.59           | 0.73      | 1.01        | 0.24      | 0.40                | 0.26      | 0.00907        | 1.19                    |
| ZFAND3           | C-A       | 0.36           | 0.10      | 1.01        | 0.00      | 0.97                | 0.08      | 0.00910        | 0.60                    |
| FAM45A           | C-A       | 1.52           | 0.45      | 2.41        | 0.31      | 2.57                | 0.45      | 0.00912        | 1.05                    |
| ERGIC1           | A-B       | 1.55           | 0.47      | 0.50        | 0.28      | 0.56                | 0.46      | 0.00912        | 1.05                    |
| DAD1             | C-A       | -0.44          | 0.66      | 0.21        | 0.51      | 0.73                | 0.23      | 0.00913        | 1.17                    |
| TMSB4X           | C-A       | 0.02           | 0.92      | 1.42        | 0.48      | 1.64                | 0.85      | 0.00916        | 1.62                    |
| KIF2A            | C-A       | 1.14           | 0.80      | 2.24        | 0.15      | 2.40                | 0.48      | 0.00917        | 1.26                    |
| UBB              | C-B       | -1.66          | 0.51      | -1.91       | 1.50      | -0.04               | 0.40      | 0.00925        | 1.87                    |
| AZIN1            | C-B       | 0.07           | 0.00      | -0.24       | 0.26      | 0.70                | 0.22      | 0.00931        | 0.94                    |
| LAMP2            | C-A       | -0.02          | 0.28      | 0.61        | 0.27      | 0.91                | 0.37      | 0.00938        | 0.94                    |
| TOMM40           | A-B       | -0.37          | 0.19      | -0.95       | 0.14      | -0.60               | 0.37      | 0.00940        | 0.58                    |
| GLYR1            | C-A       | 0.50           | 0.49      | 1.32        | 0.29      | 1.35                | 0.28      | 0.00951        | 0.85                    |
| MANBAL           | A-C       | -0.04          | 0.37      | 0.09        | 0.00      | -0.91               | 0.31      | 0.00954        | 0.87                    |
| BLVRA            | C-A       | 0.70           | 0.56      | 1.52        | 0.28      | 1.59                | 0.39      | 0.00958        | 0.89                    |
| GNAI2            | C-A       | 2.03           | 0.60      | 2.90        | 0.21      | 2.93                | 0.38      | 0.00959        | 0.90                    |
| BNIP2            | B-A       | 2.41           | 0.50      | 3.52        | 0.48      | 3.31                | 0.27      | 0.00962        | 1.11                    |
| EDEM2            | B-A       | 1.32           | 0.39      | 1.97        | 0.25      | 1.91                | 0.23      | 0.00963        | 0.65                    |
| RFX5             | B-A       | 1.57           | 0.40      | 2.41        | 0.45      | 2.13                | 0.20      | 0.00968        | 0.84                    |
| PXN              | B-A       | 1.02           | 0.26      | 1.98        | 0.64      | 1.53                | 0.45      | 0.00980        | 0.96                    |
| IFI16            | C-B       | -0.04          | 0.26      | -0.23       | 0.02      | 0.47                | 0.21      | 0.00980        | 0.70                    |
| SIRPB1           | C-B       | -1.09          | 0.40      | -1.91       | 0.80      | -0.57               | 0.37      | 0.01000        | 1.33                    |
| <b>ET</b>        |           | <b>A</b>       |           | <b>B</b>    |           | <b>C</b>            |           | <b>p value</b> | <b>Max. Mean Differ</b> |
| <b>JAK2V617F</b> |           | <b>Control</b> |           | <b>No</b>   |           | <b>heterozygote</b> |           |                |                         |
| <b>Gene</b>      | <b>BG</b> | <b>Mean</b>    | <b>SD</b> | <b>Mean</b> | <b>SD</b> | <b>Mean</b>         | <b>SD</b> |                |                         |
| SOD2             | B-A       | 1.79           | 0.49      | 3.35        | 0.22      | 3.32                | 0.52      | 0.0001         | 1.57                    |
| OAZ1             | C-A       | 1.10           | 0.61      | 2.39        | 0.33      | 2.45                | 0.24      | 0.0001         | 1.35                    |
| CDC42EP3         | C-A       | 1.01           | 0.12      | 2.14        | 0.00      | 2.29                | 0.17      | 0.0002         | 1.28                    |
| OAT              | C-A       | 0.11           | 0.08      | 0.49        | 0.00      | 0.59                | 0.07      | 0.0002         | 0.48                    |
| CIB1             | B-A       | 1.12           | 0.25      | 2.58        | 0.43      | 1.44                | 0.24      | 0.0003         | 1.46                    |
| BRI3             | C-A       | -0.06          | 0.11      | 0.30        | 0.39      | 0.98                | 0.41      | 0.0004         | 1.04                    |

|           |     |       |      |       |      |       |      |        |      |
|-----------|-----|-------|------|-------|------|-------|------|--------|------|
| LCK       | C-A | 0.65  | 0.44 | 1.75  | 0.12 | 1.80  | 0.36 | 0.0004 | 1.15 |
| TMSB4X    | C-A | 0.67  | 0.74 | 2.02  | 0.23 | 2.29  | 0.51 | 0.0004 | 1.62 |
| TMSB4X    | C-A | -0.40 | 0.80 | 1.02  | 0.43 | 1.36  | 0.55 | 0.0006 | 1.76 |
| ACTB      | C-A | -1.69 | 0.64 | -0.58 | 0.43 | 0.29  | 0.93 | 0.0006 | 1.99 |
| PF4V1     | B-A | -0.26 | 0.25 | 2.24  | 0.13 | 1.32  | 0.37 | 0.0006 | 2.50 |
| CEP89     | A-B | -0.02 | 0.38 | -1.63 | 0.20 | -1.08 | 0.31 | 0.0009 | 1.61 |
| IFITM1    | C-A | 0.17  | 0.64 | 1.20  | 0.17 | 1.30  | 0.21 | 0.0009 | 1.13 |
| RAB8B     | C-A | 1.93  | 0.38 | 3.08  | 0.00 | 3.05  | 0.40 | 0.0011 | 1.12 |
| TMEM60    | C-A | -0.02 | 0.18 | 0.23  | 0.00 | 0.63  | 0.15 | 0.0011 | 0.65 |
| REEP5     | C-A | 0.64  | 0.26 | 1.35  | 0.03 | 1.59  | 0.30 | 0.0012 | 0.95 |
| TMSB4XP2  | B-A | -1.15 | 0.43 | -0.04 | 0.44 | -0.37 | 0.40 | 0.0015 | 1.11 |
| CSF3R     | C-A | 2.83  | 0.20 | 2.99  | 0.37 | 3.82  | 0.59 | 0.0015 | 0.99 |
| NFXL1     | A-B | 1.21  | 0.03 | 0.52  | 0.07 | 0.74  | 0.06 | 0.0016 | 0.69 |
| TGFBI     | C-A | -0.31 | 0.34 | 0.30  | 0.40 | 0.65  | 0.39 | 0.0017 | 0.96 |
| TMSB4X    | C-A | 0.02  | 0.92 | 1.28  | 0.45 | 1.74  | 0.54 | 0.0021 | 1.72 |
| SLC20A1   | C-A | -0.06 | 0.17 | 0.32  | 0.32 | 0.79  | 0.36 | 0.0026 | 0.84 |
| LOC124685 | B-A | -0.67 | 0.24 | 0.38  | 0.54 | -0.16 | 0.47 | 0.0026 | 1.06 |
| SULF2     | C-A | -0.81 | 0.30 | -0.37 | 0.05 | 0.19  | 0.42 | 0.0029 | 1.00 |
| DPF3      | A-B | -0.84 | 0.10 | -2.24 | 0.37 | -1.57 | 0.22 | 0.0029 | 1.40 |
| NCF1      | C-A | 1.69  | 0.77 | 2.01  | 0.71 | 3.35  | 0.63 | 0.0030 | 1.66 |
| CKS2      | A-C | -0.83 | 0.55 | -1.73 | 0.21 | -1.90 | 0.37 | 0.0030 | 1.06 |
| PYCARD    | C-A | 1.74  | 0.43 | 2.26  | 0.36 | 2.94  | 0.54 | 0.0031 | 1.20 |
| SLC27A3   | C-A | 1.35  | 0.54 | 1.99  | 0.52 | 2.77  | 0.59 | 0.0033 | 1.42 |
| GPX1      | B-A | 1.38  | 0.46 | 2.72  | 0.70 | 2.35  | 0.51 | 0.0036 | 1.34 |
| FCN1      | C-A | 3.09  | 0.48 | 3.55  | 0.73 | 4.45  | 0.55 | 0.0038 | 1.36 |
| C12orf35  | C-A | 0.49  | 0.18 | 0.94  | 0.11 | 1.68  | 0.38 | 0.0038 | 1.19 |
| LMBRD1    | C-A | 1.62  | 0.19 | 2.07  | 0.00 | 2.40  | 0.40 | 0.0039 | 0.78 |
| RPL13AP6  | A-C | -2.96 | 0.45 | -3.65 | 0.51 | -4.00 | 0.47 | 0.0039 | 1.04 |
| BBC3      | C-A | 0.12  | 0.14 | 0.49  | 0.15 | 1.13  | 0.26 | 0.0041 | 1.01 |
| ZFAND5    | C-A | 0.26  | 0.22 | 0.43  | 0.00 | 1.38  | 0.16 | 0.0044 | 1.12 |
| IRF7      | C-A | 1.31  | 0.38 | 2.24  | 0.00 | 2.61  | 0.50 | 0.0045 | 1.29 |
| EIF4H     | A-C | -0.06 | 0.34 | -0.54 | 0.23 | -0.62 | 0.15 | 0.0045 | 0.56 |
| MFSD1     | B-A | 1.52  | 0.49 | 2.91  | 0.74 | 2.59  | 0.60 | 0.0046 | 1.39 |
| ST7L      | A-B | -1.40 | 0.08 | -3.09 | 0.22 | -2.48 | 0.36 | 0.0048 | 1.68 |
| KIAA0930  | C-A | 1.37  | 0.46 | 1.75  | 0.52 | 2.63  | 0.69 | 0.0052 | 1.26 |
| CNIH4     | C-A | -0.90 | 0.33 | -0.37 | 0.07 | -0.27 | 0.28 | 0.0052 | 0.63 |
| DTX2      | C-A | 1.56  | 0.27 | 2.33  | 0.00 | 2.32  | 0.46 | 0.0053 | 0.77 |
| CHMP5     | C-A | 0.44  | 0.68 | 1.20  | 0.41 | 1.67  | 0.45 | 0.0054 | 1.22 |
| CFL1P1    | A-C | -1.81 | 0.05 | -2.79 | 0.00 | -2.95 | 0.06 | 0.0055 | 1.14 |
| PANK2     | C-A | 0.53  | 0.39 | 0.82  | 0.25 | 1.41  | 0.37 | 0.0055 | 0.88 |
| ITM2B     | B-A | 0.54  | 0.80 | 1.79  | 0.22 | 1.69  | 0.50 | 0.0056 | 1.26 |
| WAC       | C-A | -0.20 | 0.41 | 0.30  | 0.73 | 0.94  | 0.43 | 0.0058 | 1.13 |
| 61E3.4    | A-B | -1.04 | 0.33 | -1.78 | 0.29 | -1.41 | 0.28 | 0.0059 | 0.74 |
| FTL       | B-A | -0.73 | 0.41 | 0.00  | 0.44 | -0.02 | 0.27 | 0.0059 | 0.73 |
| CTNND1    | A-B | -0.19 | 0.41 | -1.64 | 0.21 | -0.72 | 0.38 | 0.0060 | 1.45 |
| HIST2H3C  | B-A | -1.58 | 0.55 | -0.72 | 0.11 | -0.78 | 0.39 | 0.0063 | 0.86 |

|                  |           |                |           |             |           |                     |           |                |                         |
|------------------|-----------|----------------|-----------|-------------|-----------|---------------------|-----------|----------------|-------------------------|
| NOP58            | B-C       | 0.95           | 0.00      | 0.33        | 0.05      | -0.19               | 0.07      | 0.0064         | 0.52                    |
| CST3             | C-A       | 0.68           | 0.43      | 1.17        | 0.35      | 1.54                | 0.35      | 0.0065         | 0.86                    |
| MAST3            | A-C       | 2.79           | 0.00      | 0.67        | 0.00      | 1.43                | 0.11      | 0.0065         | 1.36                    |
| PSMB9            | C-A       | 1.49           | 0.44      | 2.30        | 0.23      | 2.64                | 0.57      | 0.0066         | 1.16                    |
| PRR13            | C-A       | 0.28           | 0.43      | 0.78        | 0.26      | 0.96                | 0.20      | 0.0068         | 0.69                    |
| TATDN3           | C-A       | 0.60           | 0.06      | 0.96        | 0.00      | 1.00                | 0.03      | 0.0068         | 0.40                    |
| S100A6           | C-A       | 0.46           | 0.53      | 0.96        | 0.77      | 1.61                | 0.31      | 0.0068         | 1.14                    |
| P4HTM            | C-A       | 0.80           | 0.07      | 1.04        | 0.00      | 1.90                | 0.06      | 0.0069         | 1.10                    |
| HN1              | B-A       | -0.83          | 0.19      | -0.38       | 0.35      | -0.42               | 0.18      | 0.0069         | 0.46                    |
| TNFRSF1A         | C-B       | 0.58           | 0.67      | 0.50        | 0.59      | 1.76                | 0.50      | 0.0070         | 1.26                    |
| LOC401188        | A-C       | 0.13           | 0.27      |             |           | -1.14               | 0.16      | 0.0070         | 1.28                    |
| CDK4             | A-C       | -0.95          | 0.30      | -1.66       | 0.24      | -1.75               | 0.26      | 0.0076         | 0.80                    |
| CALM1            | C-A       | -0.17          | 0.38      | 0.42        | 0.31      | 0.64                | 0.38      | 0.0076         | 0.81                    |
| CCND3            | B-A       | 0.21           | 0.22      | 1.11        | 0.49      | 0.94                | 0.40      | 0.0076         | 0.90                    |
| PPP2R5C          | C-A       | -0.60          | 0.16      | -0.39       | 0.05      | -0.12               | 0.24      | 0.0078         | 0.48                    |
| HLA-G            | B-A       | 1.16           | 0.37      | 1.92        | 0.14      | 1.78                | 0.48      | 0.0078         | 0.76                    |
| FBXL5            | C-A       | 2.37           | 0.63      | 2.41        | 0.51      | 3.48                | 0.48      | 0.0080         | 1.11                    |
| S100A4           | C-A       | 2.34           | 0.70      | 3.08        | 0.58      | 3.55                | 0.41      | 0.0081         | 1.22                    |
| MTCH1            | A-C       | 0.97           | 0.36      | 0.83        | 0.25      | 0.31                | 0.08      | 0.0082         | 0.66                    |
| HSPD1            | A-C       | -2.00          | 0.43      | -2.62       | 0.40      | -2.65               | 0.08      | 0.0083         | 0.64                    |
| PXN              | C-A       | 1.02           | 0.26      | 1.59        | 0.11      | 1.93                | 0.62      | 0.0084         | 0.91                    |
| AP1AR            | C-B       | 1.33           | 0.13      | 0.70        | 0.47      | 1.73                | 0.18      | 0.0084         | 1.03                    |
| HSPE1            | A-B       | -2.17          | 0.34      | -2.80       | 0.38      | -2.72               | 0.26      | 0.0089         | 0.63                    |
| CSNK1A1          | C-A       | 0.57           | 0.50      | 1.20        | 0.19      | 1.49                | 0.48      | 0.0089         | 0.92                    |
| USP11            | A-C       | -0.49          | 0.40      | -1.17       | 0.08      | -1.19               | 0.41      | 0.0091         | 0.70                    |
| SNRPD3           | A-B       | -0.49          | 0.18      | -0.91       | 0.15      | -0.88               | 0.10      | 0.0092         | 0.42                    |
| COTL1            | B-A       | 0.85           | 0.47      | 1.65        | 0.41      | 1.60                | 0.33      | 0.0092         | 0.80                    |
| FCN2             | A-C       | 2.10           | 0.25      |             |           | 0.67                | 0.09      | 0.0094         | 1.43                    |
| RNF144A          | A-C       | 1.54           | 0.59      | 1.03        | 0.20      | 0.65                | 0.25      | 0.0096         | 0.89                    |
| TSPO             | C-A       | 1.12           | 0.44      | 2.31        | 0.00      | 1.79                | 0.22      | 0.0100         | 0.67                    |
| <b>PMF</b>       |           | <b>A</b>       |           | <b>B</b>    |           | <b>C</b>            |           | <b>p value</b> | <b>Max. Mean Differ</b> |
| <b>JAK2V617F</b> |           | <b>Control</b> |           | <b>No</b>   |           | <b>heterozygote</b> |           |                |                         |
| <b>Gene</b>      | <b>BG</b> | <b>Mean</b>    | <b>SD</b> | <b>Mean</b> | <b>SD</b> | <b>Mean</b>         | <b>SD</b> |                |                         |
| DBI              | A-C       | -1.28          | 0.06      | -1.36       | 0.09      | -2.01               | 0.01      | 0.0001         | 0.73                    |
| LAMP1            | C-A       | -0.27          | 0.38      | 0.86        | 0.37      | 1.06                | 0.03      | 0.0023         | 1.33                    |
| RAP1B            | B-A       | 0.67           | 0.52      | 2.64        | 0.14      | 1.86                | 0.51      | 0.0029         | 1.97                    |
| CNTROB           | A-B       | 3.08           | 0.32      | 1.90        | 0.29      | 2.52                | 0.13      | 0.0032         | 1.18                    |
| STAT5A           | A-B       | 1.39           | 0.25      | 0.53        | 0.25      | 1.93                | 0.00      | 0.0046         | 0.85                    |
| POLR2E           | B-A       | 0.10           | 0.52      | 1.84        | 0.11      | 0.89                | 0.37      | 0.0046         | 1.74                    |
| ARL5A            | B-C       | 1.26           | 0.17      | 1.65        | 0.10      | 0.73                | 0.16      | 0.0049         | 0.92                    |
| TOB1             | C-A       | 1.88           | 0.79      | 3.29        | 0.00      | 4.15                | 0.23      | 0.0053         | 2.27                    |
| TPP2             | B-C       | 1.52           | 0.25      | 2.48        | 0.11      | 1.27                | 0.31      | 0.0055         | 1.22                    |
| ARIH1            | B-C       | 1.02           | 0.09      | 1.43        | 0.11      | 0.43                | 0.13      | 0.0055         | 1.00                    |
| EGFL8            | A-C       | 1.27           | 0.18      | 0.16        | 0.00      | 0.76                | 0.03      | 0.0060         | 0.52                    |
| HIPK4            | A-B       | 0.38           | 0.28      | -0.46       | 0.18      | -0.14               | 0.00      | 0.0065         | 0.84                    |
| HMG2             | B-A       | -1.97          | 0.28      | -0.97       | 0.43      | -1.22               | 0.25      | 0.0081         | 1.00                    |



|             |     |       |      |       |      |       |      |        |      |
|-------------|-----|-------|------|-------|------|-------|------|--------|------|
| PARP9       | C-A | 0.62  | 0.21 | 0.94  | 0.29 | 2.01  | 0.24 | 0.0083 | 1.38 |
| CAPNS1      | B-C | -0.99 | 0.11 | -0.77 | 0.04 | -1.40 | 0.10 | 0.0085 | 0.64 |
| IL23A       | A-C | -1.18 | 0.16 | -1.26 | 0.18 | -1.71 | 0.02 | 0.0090 | 0.52 |
| RPSAP58     | B-A | -0.54 | 0.29 | 0.38  | 0.41 | 0.18  | 0.24 | 0.0091 | 0.92 |
| LOC124685   | B-A | -0.67 | 0.24 | 0.16  | 0.24 | -0.35 | 0.30 | 0.0106 | 0.83 |
| SOD2        | C-A | 1.79  | 0.49 | 3.48  | 0.00 | 3.40  | 0.93 | 0.0117 | 1.62 |
| UBB         | B-A | -1.66 | 0.51 | -0.38 | 0.04 | -0.73 | 0.25 | 0.0122 | 1.28 |
| ZNF728      | C-A | -1.10 | 0.18 | -0.50 | 0.36 | -0.42 | 0.27 | 0.0124 | 0.68 |
| CCND3       | B-A | 0.21  | 0.22 | 1.21  | 0.40 | 0.76  | 0.21 | 0.0136 | 1.01 |
| HMG1L10     | B-A | -0.76 | 0.42 | 0.49  | 0.46 | -0.19 | 0.16 | 0.0148 | 1.25 |
| SERHL2      | A-B | -0.17 | 0.41 | -1.37 | 0.28 | -0.38 | 0.00 | 0.0154 | 1.20 |
| NSUN5       | A-B | 0.27  | 0.16 | -0.19 | 0.16 | 0.32  | 0.00 | 0.0154 | 0.47 |
| HLA-E       | B-A | 1.76  | 0.55 | 3.31  | 0.00 | 2.60  | 0.29 | 0.0159 | 1.55 |
| AVP         | C-A | 1.01  | 0.19 | 1.58  | 0.00 | 1.83  | 0.32 | 0.0174 | 0.82 |
| GADD45B     | A-C | 1.26  | 0.43 | 1.12  | 0.00 | -0.27 | 1.11 | 0.0177 | 1.53 |
| TNFAIP3     | A-C | 2.69  | 0.71 | 2.54  | 0.00 | 1.00  | 0.53 | 0.0180 | 1.69 |
| RFWD2       | B-A | 1.47  | 0.16 | 2.08  | 0.09 | 1.63  | 0.16 | 0.0181 | 0.61 |
| MAFF        | A-C | 1.19  | 0.46 | 0.38  | 0.00 | 0.08  | 0.31 | 0.0200 | 1.12 |
| HN1         | B-A | -0.83 | 0.19 | -0.18 | 0.16 | -0.58 | 0.35 | 0.0207 | 0.66 |
| EIF4A1      | B-C | 0.17  | 0.42 | 0.72  | 0.16 | -0.73 | 0.30 | 0.0211 | 1.46 |
| HSP90B1     | B-A | -1.44 | 0.48 | -0.13 | 0.11 | -0.99 | 0.30 | 0.0216 | 1.31 |
| ZNF708      | B-A | -0.51 | 0.37 | 0.35  | 0.39 | 0.26  | 0.22 | 0.0219 | 0.86 |
| VPS8        | B-C | -0.16 | 0.16 | 0.57  | 0.09 | -0.47 | 0.40 | 0.0227 | 1.04 |
| C1orf63     | B-C | 1.57  | 0.05 | 1.94  | 0.22 | 1.33  | 0.03 | 0.0235 | 0.61 |
| hsa-mir-425 | C-B | 0.61  | 0.60 | 0.26  | 0.35 | 2.10  | 0.32 | 0.0241 | 1.83 |
| DAD1        | B-A | -0.44 | 0.66 | 1.00  | 0.48 | 0.80  | 0.23 | 0.0242 | 1.44 |
| YBX1        | B-A | -3.27 | 0.31 | -2.35 | 0.50 | -2.69 | 0.06 | 0.0244 | 0.92 |
| YWHAH       | C-A | 0.17  | 0.52 | 1.32  | 0.25 | 1.52  | 0.38 | 0.0251 | 1.34 |
| SF3B3       | A-B | -0.86 | 0.32 | -1.63 | 0.03 | -0.76 | 0.00 | 0.0253 | 0.77 |
| TCEAL4      | A-B | 0.19  | 0.07 | -0.28 | 0.19 | 0.15  | 0.04 | 0.0257 | 0.47 |
| LGALS9      | A-B | 1.10  | 0.18 | 0.30  | 0.35 | 0.48  | 0.45 | 0.0258 | 0.79 |
| LOC220906   | B-A | 0.92  | 0.33 | 1.83  | 0.26 | 1.54  | 0.49 | 0.0262 | 0.91 |
| NCKAP5L     | A-B | 1.88  | 0.48 | 0.60  | 0.47 | 1.19  | 0.17 | 0.0263 | 1.28 |
| CHMP5       | C-A | 0.44  | 0.68 | 1.73  | 0.18 | 1.73  | 0.22 | 0.0274 | 1.29 |
| ANKRD62     | B-A | -2.10 | 0.30 | -1.36 | 0.19 | -1.65 | 0.25 | 0.0277 | 0.74 |
| PTGES3      | B-A | -0.82 | 0.44 | 0.54  | 0.55 | -0.01 | 0.40 | 0.0288 | 1.36 |
| STOM        | C-A | 0.65  | 0.47 | 1.97  | 0.49 | 2.07  | 0.38 | 0.0290 | 1.43 |
| OST4        | C-A | -0.74 | 0.58 | 0.84  | 0.00 | 0.58  | 0.54 | 0.0298 | 1.32 |
| FCHO1       | A-B | 1.97  | 0.48 | 0.72  | 0.35 | 1.25  | 0.55 | 0.0304 | 1.25 |
| DGCR5       | A-C | 1.20  | 0.33 | 0.27  | 0.00 | 0.46  | 0.35 | 0.0310 | 0.74 |
| ATP5H       | B-A | -1.54 | 0.42 | -0.61 | 0.00 | -0.90 | 0.35 | 0.0316 | 0.93 |
| HIST2H3D    | B-A | -1.77 | 0.64 | -0.46 | 0.41 | -0.63 | 0.32 | 0.0318 | 1.31 |
| GAPDH       | B-A | -2.49 | 0.38 | -1.66 | 0.13 | -2.01 | 0.08 | 0.0319 | 0.83 |
| NUPL1       | B-A | 0.03  | 0.18 | 0.59  | 0.07 | 0.16  | 0.03 | 0.0328 | 0.56 |
| IGJ         | A-C | -1.28 | 0.50 | -2.16 | 0.64 | -2.53 | 0.03 | 0.0340 | 1.25 |
| MRPS21      | A-B | -0.52 | 0.26 | -1.08 | 0.09 | -0.92 | 0.18 | 0.0361 | 0.56 |

|                |     |       |      |       |      |       |      |        |      |
|----------------|-----|-------|------|-------|------|-------|------|--------|------|
| PGRMC1         | C-A | 0.05  | 0.57 | 1.24  | 0.34 | 2.11  | 0.86 | 0.0374 | 2.06 |
| HMG2           | B-A | -0.84 | 0.51 | 0.39  | 0.11 | 0.04  | 0.73 | 0.0376 | 1.23 |
| WAC            | B-A | -0.20 | 0.41 | 0.77  | 0.19 | -0.11 | 0.02 | 0.0378 | 0.97 |
| CCL3           | A-C | 2.45  | 0.40 | 1.46  | 0.09 | 1.46  | 0.75 | 0.0379 | 0.99 |
| SEPT7          | B-A | -1.36 | 0.23 | -0.37 | 0.41 | -0.99 | 0.24 | 0.0393 | 0.98 |
| ZNF383         | A-C | 3.15  | 0.60 | 1.72  | 0.00 | 1.87  | 0.57 | 0.0400 | 1.29 |
| SP2            | A-B | 2.26  | 0.80 | 0.53  | 0.28 | 1.26  | 0.47 | 0.0400 | 1.73 |
| NDUFC2         | B-A | -1.39 | 0.49 | -0.28 | 0.26 | -0.56 | 0.57 | 0.0410 | 1.11 |
| KRT14          | A-B | 2.35  | 0.58 | 0.88  | 0.46 | 1.64  | 0.66 | 0.0410 | 1.47 |
| PPTC7          | A-C | 1.70  | 0.32 | 1.56  | 0.54 | 0.68  | 0.08 | 0.0411 | 1.01 |
| ZNF208         | B-A | -1.69 | 0.24 | -0.86 | 0.78 | -1.04 | 0.04 | 0.0416 | 0.83 |
| hsa-mir-373    | C-B | 1.19  | 0.81 | 0.93  | 0.30 | 3.03  | 0.67 | 0.0420 | 2.10 |
| MAD2L1BP       | B-A | 0.62  | 0.31 | 1.43  | 0.34 | 0.88  | 0.27 | 0.0422 | 0.81 |
| HIGD1A         | B-A | -0.69 | 0.48 | 0.46  | 0.12 | -0.16 | 0.04 | 0.0423 | 1.15 |
| ZNF34          | A-C | 0.24  | 0.15 | 0.54  | 0.00 | -0.10 | 0.02 | 0.0424 | 0.33 |
| ARF1           | B-A | 0.57  | 0.37 | 1.37  | 0.00 | 0.99  | 0.07 | 0.0426 | 0.80 |
| ACSL4          | A-B | 2.37  | 0.99 | 0.12  | 0.51 | 1.98  | 0.13 | 0.0429 | 2.25 |
| LPCAT4         | A-C | 0.95  | 0.19 | -0.14 | 0.00 | 0.54  | 0.16 | 0.0431 | 0.41 |
| TGIF2-C20ORF24 | B-A | -0.62 | 0.26 | 0.23  | 0.17 | -0.29 | 0.17 | 0.0435 | 0.84 |
| HMG2           | B-A | -1.43 | 0.35 | -0.54 | 0.55 | -0.67 | 0.12 | 0.0439 | 0.89 |
| LGALS1         | B-C | -1.41 | 0.40 | -1.15 | 0.53 | -2.42 | 0.39 | 0.0449 | 1.27 |
| UNC119         | A-C | 1.34  | 0.25 | 1.60  | 0.00 | 0.83  | 0.18 | 0.0456 | 0.51 |
| NR2F2          | A-B | 0.45  | 0.64 | -0.96 | 0.18 | -0.64 | 0.88 | 0.0465 | 1.41 |
| AIF1           | B-A | 2.98  | 0.48 | 3.96  | 0.23 | 3.65  | 0.09 | 0.0465 | 0.98 |
| C8orf44        | A-B | 2.55  | 0.79 | 0.74  | 0.27 | 2.05  | 0.38 | 0.0466 | 1.81 |
| SEC24C         | A-B | 0.60  | 0.25 | -0.61 | 0.94 | 0.34  | 0.49 | 0.0469 | 1.21 |
| SORL1          | B-A | 1.87  | 0.52 | 3.01  | 0.09 | 2.35  | 0.00 | 0.0471 | 1.14 |
| CD63           | B-A | -1.59 | 0.22 | -1.01 | 0.07 | -1.55 | 0.34 | 0.0471 | 0.59 |
| DBI            | A-C | -1.09 | 0.10 | -1.14 | 0.12 | -1.61 | 0.03 | 0.0475 | 0.52 |
| FMNL1          | A-C | 1.47  | 0.25 | 1.94  | 0.00 | 0.99  | 0.07 | 0.0478 | 0.47 |
| ECM1           | A-C | 0.44  | 0.27 |       |      | -0.49 | 0.53 | 0.0480 | 0.94 |
| ID3            | A-C | -2.10 | 0.48 | -3.05 | 0.49 | -3.12 | 0.16 | 0.0482 | 1.01 |
| SEPT2          | B-A | -0.13 | 0.29 | 0.74  | 0.44 | 0.14  | 0.33 | 0.0483 | 0.87 |
| SUMO2          | B-A | -1.82 | 0.40 | -0.97 | 0.35 | -1.22 | 0.22 | 0.0490 | 0.84 |
| MTCH1          | B-C | 0.97  | 0.36 | 1.07  | 0.39 | 0.10  | 0.19 | 0.0498 | 0.98 |

|             |     |       |      |       |      |       |      |        |      |
|-------------|-----|-------|------|-------|------|-------|------|--------|------|
| DBI         | A-C | -1.28 | 0.06 | -1.36 | 0.09 | -2.01 | 0.01 | 0.0001 | 0.73 |
| LAMP1       | C-A | -0.27 | 0.38 | 0.86  | 0.37 | 1.06  | 0.03 | 0.0023 | 1.33 |
| RAP1B       | B-A | 0.67  | 0.52 | 2.64  | 0.14 | 1.86  | 0.51 | 0.0029 | 1.97 |
| CNTROB      | A-B | 3.08  | 0.32 | 1.90  | 0.29 | 2.52  | 0.13 | 0.0032 | 1.18 |
| STAT5A      | A-B | 1.39  | 0.25 | 0.53  | 0.25 | 1.93  | 0.00 | 0.0046 | 0.85 |
| POLR2E      | B-A | 0.10  | 0.52 | 1.84  | 0.11 | 0.89  | 0.37 | 0.0046 | 1.74 |
| ARL5A       | B-C | 1.26  | 0.17 | 1.65  | 0.10 | 0.73  | 0.16 | 0.0049 | 0.92 |
| TOB1        | C-A | 1.88  | 0.79 | 3.29  | 0.00 | 4.15  | 0.23 | 0.0053 | 2.27 |
| TPP2        | B-C | 1.52  | 0.25 | 2.48  | 0.11 | 1.27  | 0.31 | 0.0055 | 1.22 |
| ARIH1       | B-C | 1.02  | 0.09 | 1.43  | 0.11 | 0.43  | 0.13 | 0.0055 | 1.00 |
| EGFL8       | A-C | 1.27  | 0.18 | 0.16  | 0.00 | 0.76  | 0.03 | 0.0060 | 0.52 |
| HIPK4       | A-B | 0.38  | 0.28 | -0.46 | 0.18 | -0.14 | 0.00 | 0.0065 | 0.84 |
| HMG2        | B-A | -1.97 | 0.28 | -0.97 | 0.43 | -1.22 | 0.25 | 0.0081 | 1.00 |
| PARP9       | C-A | 0.62  | 0.21 | 0.94  | 0.29 | 2.01  | 0.24 | 0.0083 | 1.38 |
| CAPNS1      | B-C | -0.99 | 0.11 | -0.77 | 0.04 | -1.40 | 0.10 | 0.0085 | 0.64 |
| IL23A       | A-C | -1.18 | 0.16 | -1.26 | 0.18 | -1.71 | 0.02 | 0.0090 | 0.52 |
| RPSAP58     | B-A | -0.54 | 0.29 | 0.38  | 0.41 | 0.18  | 0.24 | 0.0091 | 0.92 |
| LOC124685   | B-A | -0.67 | 0.24 | 0.16  | 0.24 | -0.35 | 0.30 | 0.0106 | 0.83 |
| SOD2        | C-A | 1.79  | 0.49 | 3.48  | 0.00 | 3.40  | 0.93 | 0.0117 | 1.62 |
| UBB         | B-A | -1.66 | 0.51 | -0.38 | 0.04 | -0.73 | 0.25 | 0.0122 | 1.28 |
| ZNF728      | C-A | -1.10 | 0.18 | -0.50 | 0.36 | -0.42 | 0.27 | 0.0124 | 0.68 |
| CCND3       | B-A | 0.21  | 0.22 | 1.21  | 0.40 | 0.76  | 0.21 | 0.0136 | 1.01 |
| HMG1L10     | B-A | -0.76 | 0.42 | 0.49  | 0.46 | -0.19 | 0.16 | 0.0148 | 1.25 |
| SERHL2      | A-B | -0.17 | 0.41 | -1.37 | 0.28 | -0.38 | 0.00 | 0.0154 | 1.20 |
| NSUN5       | A-B | 0.27  | 0.16 | -0.19 | 0.16 | 0.32  | 0.00 | 0.0154 | 0.47 |
| HLA-E       | B-A | 1.76  | 0.55 | 3.31  | 0.00 | 2.60  | 0.29 | 0.0159 | 1.55 |
| AVP         | C-A | 1.01  | 0.19 | 1.58  | 0.00 | 1.83  | 0.32 | 0.0174 | 0.82 |
| GADD45B     | A-C | 1.26  | 0.43 | 1.12  | 0.00 | -0.27 | 1.11 | 0.0177 | 1.53 |
| TNFAIP3     | A-C | 2.69  | 0.71 | 2.54  | 0.00 | 1.00  | 0.53 | 0.0180 | 1.69 |
| RFWD2       | B-A | 1.47  | 0.16 | 2.08  | 0.09 | 1.63  | 0.16 | 0.0181 | 0.61 |
| MAFF        | A-C | 1.19  | 0.46 | 0.38  | 0.00 | 0.08  | 0.31 | 0.0200 | 1.12 |
| HN1         | B-A | -0.83 | 0.19 | -0.18 | 0.16 | -0.58 | 0.35 | 0.0207 | 0.66 |
| EIF4A1      | B-C | 0.17  | 0.42 | 0.72  | 0.16 | -0.73 | 0.30 | 0.0211 | 1.46 |
| HSP90B1     | B-A | -1.44 | 0.48 | -0.13 | 0.11 | -0.99 | 0.30 | 0.0216 | 1.31 |
| ZNF708      | B-A | -0.51 | 0.37 | 0.35  | 0.39 | 0.26  | 0.22 | 0.0219 | 0.86 |
| VPS8        | B-C | -0.16 | 0.16 | 0.57  | 0.09 | -0.47 | 0.40 | 0.0227 | 1.04 |
| C1orf63     | B-C | 1.57  | 0.05 | 1.94  | 0.22 | 1.33  | 0.03 | 0.0235 | 0.61 |
| hsa-mir-425 | C-B | 0.61  | 0.60 | 0.26  | 0.35 | 2.10  | 0.32 | 0.0241 | 1.83 |
| DAD1        | B-A | -0.44 | 0.66 | 1.00  | 0.48 | 0.80  | 0.23 | 0.0242 | 1.44 |
| YBX1        | B-A | -3.27 | 0.31 | -2.35 | 0.50 | -2.69 | 0.06 | 0.0244 | 0.92 |
| YWHAH       | C-A | 0.17  | 0.52 | 1.32  | 0.25 | 1.52  | 0.38 | 0.0251 | 1.34 |
| SF3B3       | A-B | -0.86 | 0.32 | -1.63 | 0.03 | -0.76 | 0.00 | 0.0253 | 0.77 |
| TCEAL4      | A-B | 0.19  | 0.07 | -0.28 | 0.19 | 0.15  | 0.04 | 0.0257 | 0.47 |
| LGALS9      | A-B | 1.10  | 0.18 | 0.30  | 0.35 | 0.48  | 0.45 | 0.0258 | 0.79 |
| LOC220906   | B-A | 0.92  | 0.33 | 1.83  | 0.26 | 1.54  | 0.49 | 0.0262 | 0.91 |
| NCKAP5L     | A-B | 1.88  | 0.48 | 0.60  | 0.47 | 1.19  | 0.17 | 0.0263 | 1.28 |
| CHMP5       | C-A | 0.44  | 0.68 | 1.73  | 0.18 | 1.73  | 0.22 | 0.0274 | 1.29 |
| ANKRD62     | B-A | -2.10 | 0.30 | -1.36 | 0.19 | -1.65 | 0.25 | 0.0277 | 0.74 |
| PTGES3      | B-A | -0.82 | 0.44 | 0.54  | 0.55 | -0.01 | 0.40 | 0.0288 | 1.36 |

|                |     |       |      |       |      |       |      |        |      |
|----------------|-----|-------|------|-------|------|-------|------|--------|------|
| STOM           | C-A | 0.65  | 0.47 | 1.97  | 0.49 | 2.07  | 0.38 | 0.0290 | 1.43 |
| OST4           | C-A | -0.74 | 0.58 | 0.84  | 0.00 | 0.58  | 0.54 | 0.0298 | 1.32 |
| FCHO1          | A-B | 1.97  | 0.48 | 0.72  | 0.35 | 1.25  | 0.55 | 0.0304 | 1.25 |
| DGCR5          | A-C | 1.20  | 0.33 | 0.27  | 0.00 | 0.46  | 0.35 | 0.0310 | 0.74 |
| ATP5H          | B-A | -1.54 | 0.42 | -0.61 | 0.00 | -0.90 | 0.35 | 0.0316 | 0.93 |
| HIST2H3D       | B-A | -1.77 | 0.64 | -0.46 | 0.41 | -0.63 | 0.32 | 0.0318 | 1.31 |
| GAPDH          | B-A | -2.49 | 0.38 | -1.66 | 0.13 | -2.01 | 0.08 | 0.0319 | 0.83 |
| NUPL1          | B-A | 0.03  | 0.18 | 0.59  | 0.07 | 0.16  | 0.03 | 0.0328 | 0.56 |
| IGJ            | A-C | -1.28 | 0.50 | -2.16 | 0.64 | -2.53 | 0.03 | 0.0340 | 1.25 |
| MRPS21         | A-B | -0.52 | 0.26 | -1.08 | 0.09 | -0.92 | 0.18 | 0.0361 | 0.56 |
| PGRMC1         | C-A | 0.05  | 0.57 | 1.24  | 0.34 | 2.11  | 0.86 | 0.0374 | 2.06 |
| HMG2           | B-A | -0.84 | 0.51 | 0.39  | 0.11 | 0.04  | 0.73 | 0.0376 | 1.23 |
| WAC            | B-A | -0.20 | 0.41 | 0.77  | 0.19 | -0.11 | 0.02 | 0.0378 | 0.97 |
| CCL3           | A-C | 2.45  | 0.40 | 1.46  | 0.09 | 1.46  | 0.75 | 0.0379 | 0.99 |
| SEPT7          | B-A | -1.36 | 0.23 | -0.37 | 0.41 | -0.99 | 0.24 | 0.0393 | 0.98 |
| ZNF383         | A-C | 3.15  | 0.60 | 1.72  | 0.00 | 1.87  | 0.57 | 0.0400 | 1.29 |
| SP2            | A-B | 2.26  | 0.80 | 0.53  | 0.28 | 1.26  | 0.47 | 0.0400 | 1.73 |
| NDUFC2         | B-A | -1.39 | 0.49 | -0.28 | 0.26 | -0.56 | 0.57 | 0.0410 | 1.11 |
| KRT14          | A-B | 2.35  | 0.58 | 0.88  | 0.46 | 1.64  | 0.66 | 0.0410 | 1.47 |
| PPTC7          | A-C | 1.70  | 0.32 | 1.56  | 0.54 | 0.68  | 0.08 | 0.0411 | 1.01 |
| ZNF208         | B-A | -1.69 | 0.24 | -0.86 | 0.78 | -1.04 | 0.04 | 0.0416 | 0.83 |
| hsa-mir-373    | C-B | 1.19  | 0.81 | 0.93  | 0.30 | 3.03  | 0.67 | 0.0420 | 2.10 |
| MAD2L1BP       | B-A | 0.62  | 0.31 | 1.43  | 0.34 | 0.88  | 0.27 | 0.0422 | 0.81 |
| HIGD1A         | B-A | -0.69 | 0.48 | 0.46  | 0.12 | -0.16 | 0.04 | 0.0423 | 1.15 |
| ZNF34          | A-C | 0.24  | 0.15 | 0.54  | 0.00 | -0.10 | 0.02 | 0.0424 | 0.33 |
| ARF1           | B-A | 0.57  | 0.37 | 1.37  | 0.00 | 0.99  | 0.07 | 0.0426 | 0.80 |
| ACSL4          | A-B | 2.37  | 0.99 | 0.12  | 0.51 | 1.98  | 0.13 | 0.0429 | 2.25 |
| LPCAT4         | A-C | 0.95  | 0.19 | -0.14 | 0.00 | 0.54  | 0.16 | 0.0431 | 0.41 |
| TGIF2-C200RF24 | B-A | -0.62 | 0.26 | 0.23  | 0.17 | -0.29 | 0.17 | 0.0435 | 0.84 |
| HMG2           | B-A | -1.43 | 0.35 | -0.54 | 0.55 | -0.67 | 0.12 | 0.0439 | 0.89 |
| LGALS1         | B-C | -1.41 | 0.40 | -1.15 | 0.53 | -2.42 | 0.39 | 0.0449 | 1.27 |
| UNC119         | A-C | 1.34  | 0.25 | 1.60  | 0.00 | 0.83  | 0.18 | 0.0456 | 0.51 |
| NR2F2          | A-B | 0.45  | 0.64 | -0.96 | 0.18 | -0.64 | 0.88 | 0.0465 | 1.41 |
| AIF1           | B-A | 2.98  | 0.48 | 3.96  | 0.23 | 3.65  | 0.09 | 0.0465 | 0.98 |
| C8orf44        | A-B | 2.55  | 0.79 | 0.74  | 0.27 | 2.05  | 0.38 | 0.0466 | 1.81 |
| SEC24C         | A-B | 0.60  | 0.25 | -0.61 | 0.94 | 0.34  | 0.49 | 0.0469 | 1.21 |
| SORL1          | B-A | 1.87  | 0.52 | 3.01  | 0.09 | 2.35  | 0.00 | 0.0471 | 1.14 |
| CD63           | B-A | -1.59 | 0.22 | -1.01 | 0.07 | -1.55 | 0.34 | 0.0471 | 0.59 |
| DBI            | A-C | -1.09 | 0.10 | -1.14 | 0.12 | -1.61 | 0.03 | 0.0475 | 0.52 |
| FMNL1          | A-C | 1.47  | 0.25 | 1.94  | 0.00 | 0.99  | 0.07 | 0.0478 | 0.47 |
| ECM1           | A-C | 0.44  | 0.27 |       |      | -0.49 | 0.53 | 0.0480 | 0.94 |
| ID3            | A-C | -2.10 | 0.48 | -3.05 | 0.49 | -3.12 | 0.16 | 0.0482 | 1.01 |
| SEPT2          | B-A | -0.13 | 0.29 | 0.74  | 0.44 | 0.14  | 0.33 | 0.0483 | 0.87 |
| SUMO2          | B-A | -1.82 | 0.40 | -0.97 | 0.35 | -1.22 | 0.22 | 0.0490 | 0.84 |
| MTCH1          | B-C | 0.97  | 0.36 | 1.07  | 0.39 | 0.10  | 0.19 | 0.0498 | 0.98 |
